# Supplementary material for: DNA double strand break repair defect and sensitivity to poly ADP-ribose polymerase (PARP) inhibition in human papillomavirus 16-positive head and neck squamous cell carcinoma
Source: PubMed Central journal article supplement (PMC4694969; doi:10.18632/oncotarget.4863), 2015-08-22
Supplement: oncotarget-06-26995-s001.pdf [file oncotarget-06-26995-s001.pdf]

## SUPPLEMENTARY FIGURES AND TABLE

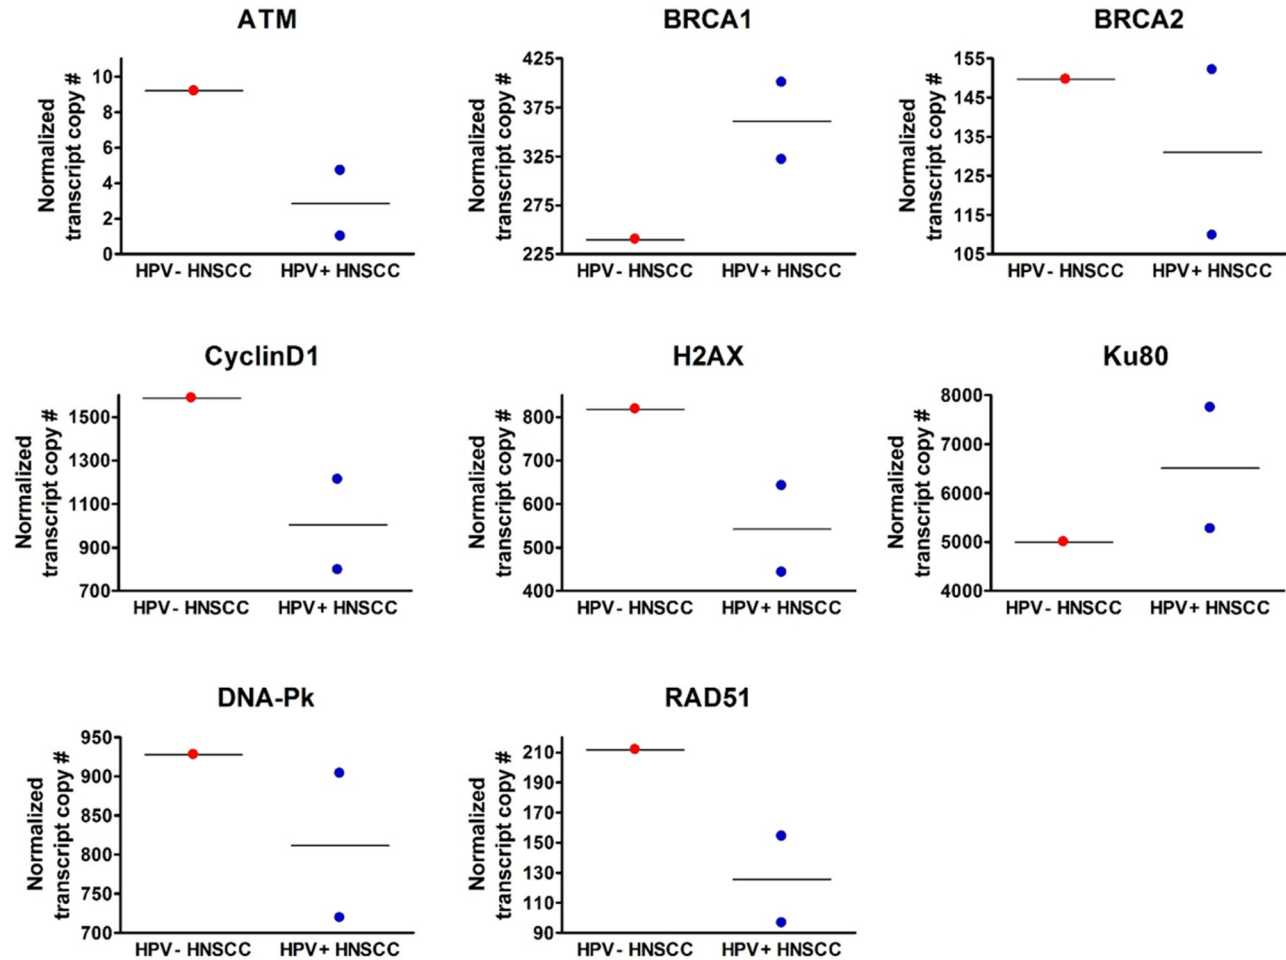

**Supplementary Figure S1: mRNA expression of DSB repair genes in HNSCC cell lines.** RNA was extracted from UM-SCC1, UM-SCC47, and UPCI:SCC154 cells and processed using the NanoString nCounter platform. Gene expression data for each cell line were normalized using a built-in panel of housekeeping genes. Shown are normalized transcript copy numbers per 100 ng of RNA.

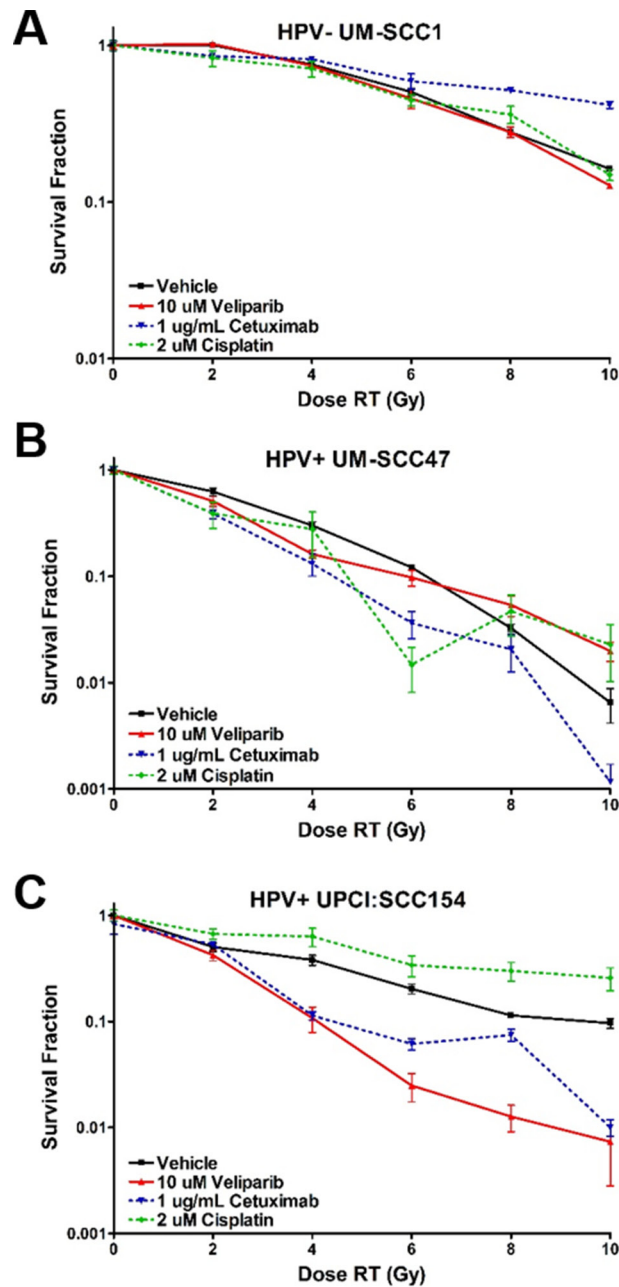

**Supplementary Figure S2: Veliparib, cetuximab, and cisplatin as radiosensitizers in HNSCC cell lines.** A. UM-SCC1, B. UM-SCC47, and C. UPI:SCC154 cells were plated at two different densities and treated with the indicated doses of the PARP inhibitor veliparib, the anti-EGFRr monoclonal antibody cetuximab, or cisplatin in combination with increasing doses of IR. After treatment, cells were left undisturbed for approximately 2 weeks, then fixed and stained for colony counting. Shown is the mean  $\pm$  SEM from at least 2 independent experiments performed in triplicate.

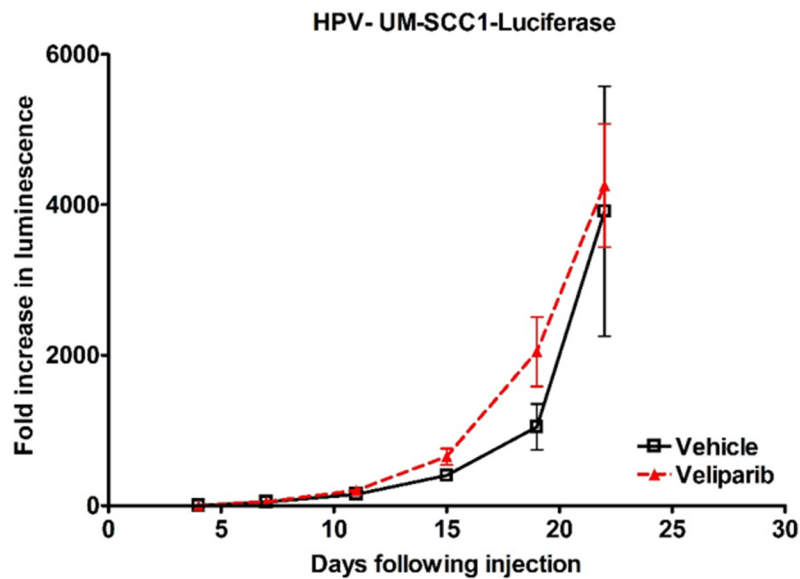

**Supplementary Figure S3: HPV- HNSCCs are not sensitive to PARP inhibition *in vivo*.** 100,000 UM-SCC1-luciferase cells were injected orthotopically into NOD-SCID mice. Tumor volume was calculated bi-weekly using a luciferase bioluminescence assay. At post-injection day 7, mice were randomly divided into vehicle (normal saline) or veliparib (200 mg/kg twice daily) groups with 10 mice per group. Mice were treated by oral gavage twice per day. Shown is the mean fold change in tumor volume  $\pm$  SEM.  $**p < 0.01$ .

**Supplementary Table S1: HNSCC cell line characteristics**

| Cell Line   | Site of Origin | HPV16 Status         | Viral Load | Smoking Status | p53 Status                           |
|-------------|----------------|----------------------|------------|----------------|--------------------------------------|
| UM-SCC1     | Oral cavity    | Negative             | 0          | Unknown        | Wild type, no expression             |
| UM-SCC47    | Oral cavity    | Positive, integrated | 15         | Positive       | Exon 4 polymorphism, weak expression |
| UPCI:SCC154 | Oral cavity    | Positive, integrated | 1          | Positive       | Wild type                            |
